# Supplementary material for: An ultrasensitive colorimetric and fluorescence dual-readout assay for glutathione with a carbon dot–MnO2 nanosheet platform based on the inner filter effect
Source: Royal Society of Chemistry journal article supplement (doi:10.1039/d1ra02411f), 2021-01-01
Supplement: d1ra02411f1.pdf [file d1ra02411f1.pdf]

An ultrasensitive colorimetric and fluorescence dual-readout assay for  
glutathione with carbon dots-MnO<sub>2</sub> nanosheets platform based on inner  
filter effect

Mengyuan He, \* Ning Shang, Bo Zheng, GeGe Yue

College of Chemistry and Chemical Engineering, Xinyang Normal University,  
Xinyang 464000, China.

\* Corresponding authors.

E-mail: [myhe@xynu.edu.cn](mailto:myhe@xynu.edu.cn) (M. He)

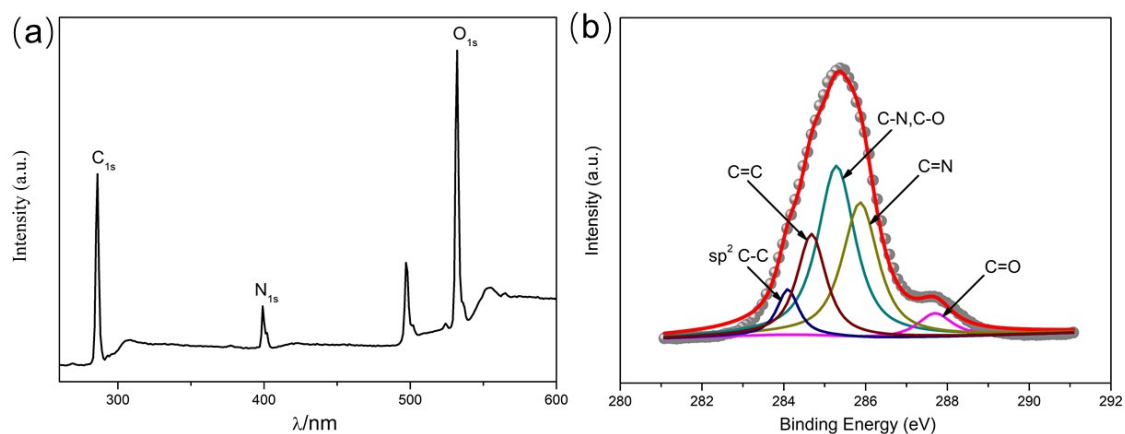

**Fig. S1** (a) XPS spectrum of the C-dots. (b) High-resolution C-dots XPS spectra of C<sub>1s</sub>.

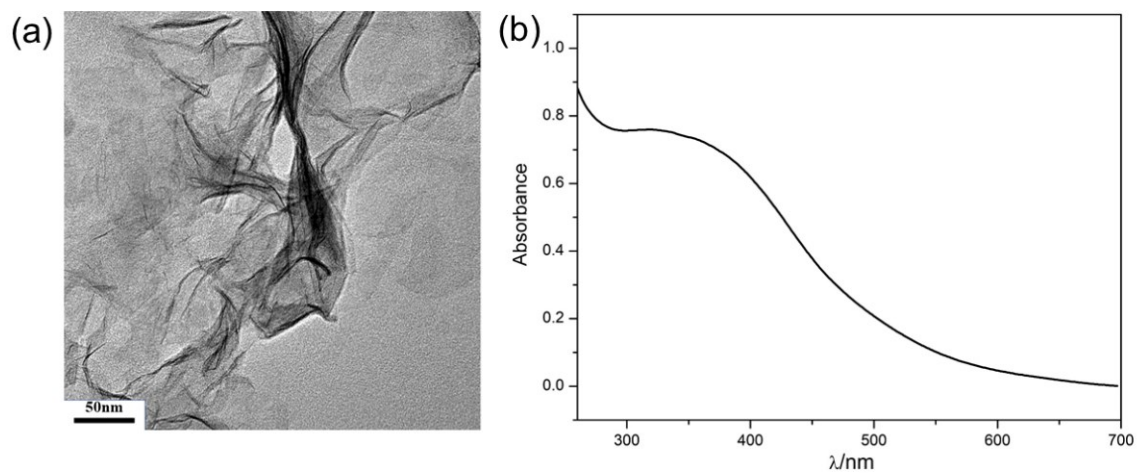

**Fig. S2** (a) TEM image of MnO<sub>2</sub> nanosheets. (b) The UV-vis absorption spectrum of MnO<sub>2</sub> nanosheets.

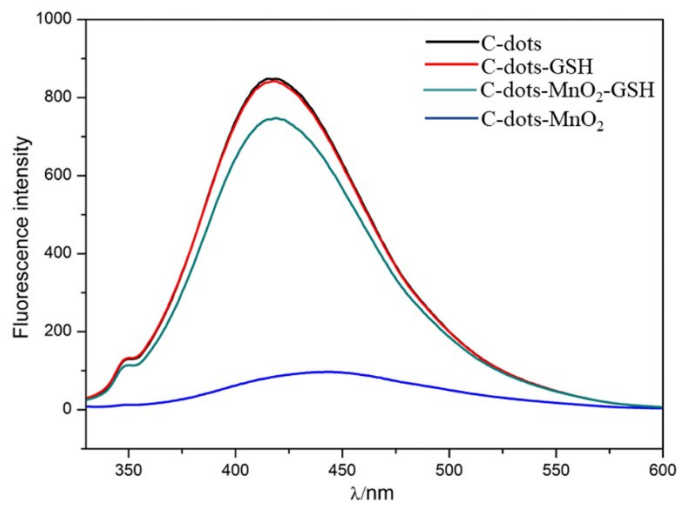

**Fig. S3** The fluorescence emission spectra of C-dots in the absence and presence of MnO<sub>2</sub> nanosheets and GSH.

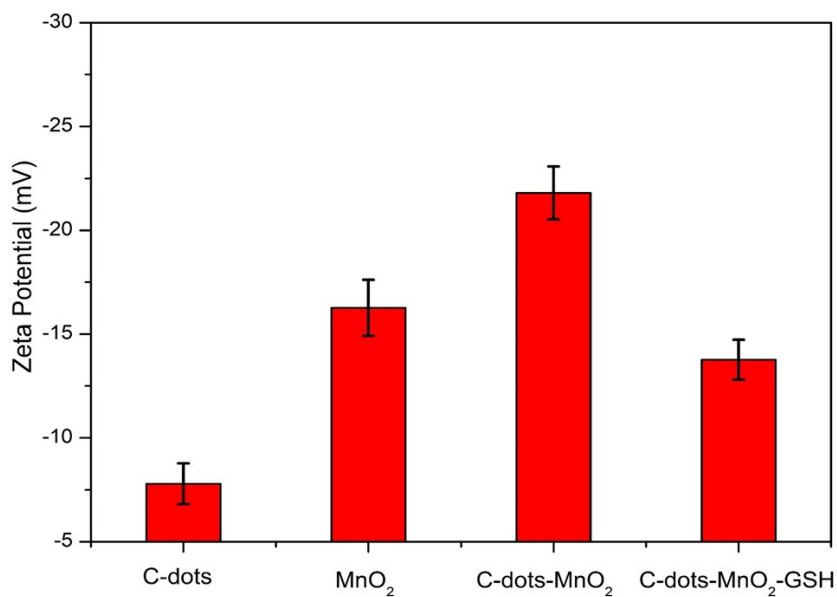

**Fig. S4** The zeta potential of C-dots, MnO<sub>2</sub> nanosheets, C-dots-MnO<sub>2</sub> nanosheets mixture, and C-dots-MnO<sub>2</sub> nanosheets mixture added with GSH. All of these characters were measured in MES buffer (10 mM, pH 6.0).

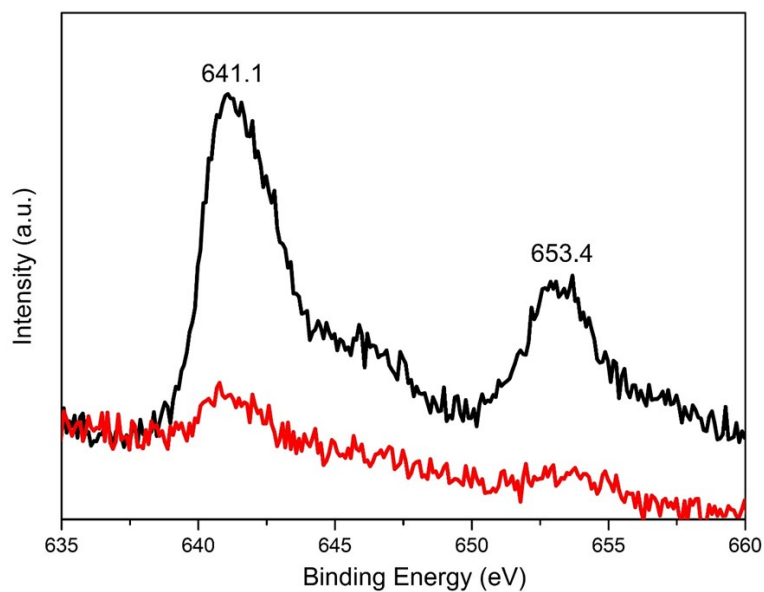

**Fig. S5** The XPS spectrum of the C-dots-MnO<sub>2</sub> nanosheets mixture in the absence and presence of GSH.

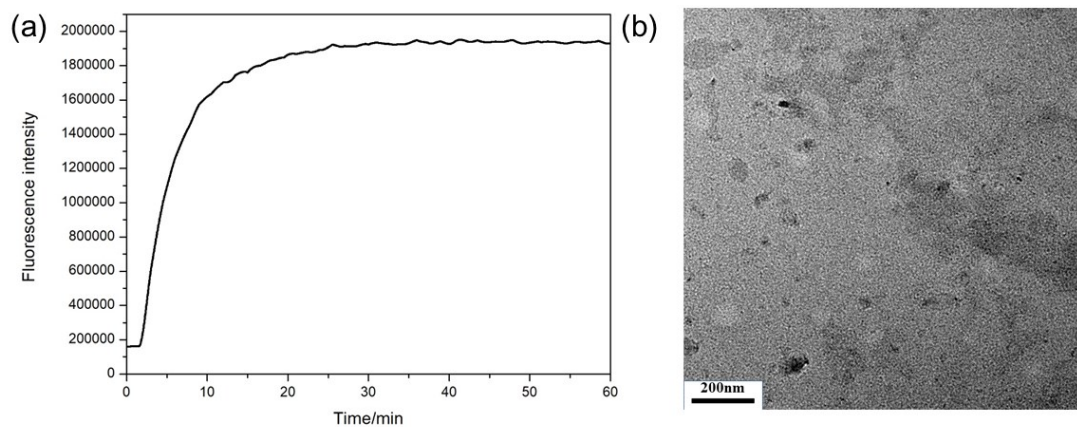

**Fig. S6** (a) The fluorescence recovery kinetics between C-dots-MnO<sub>2</sub> mixture and GSH. (b) TEM image of the mixture of Cdots-MnO<sub>2</sub> nanosheets and GSH.

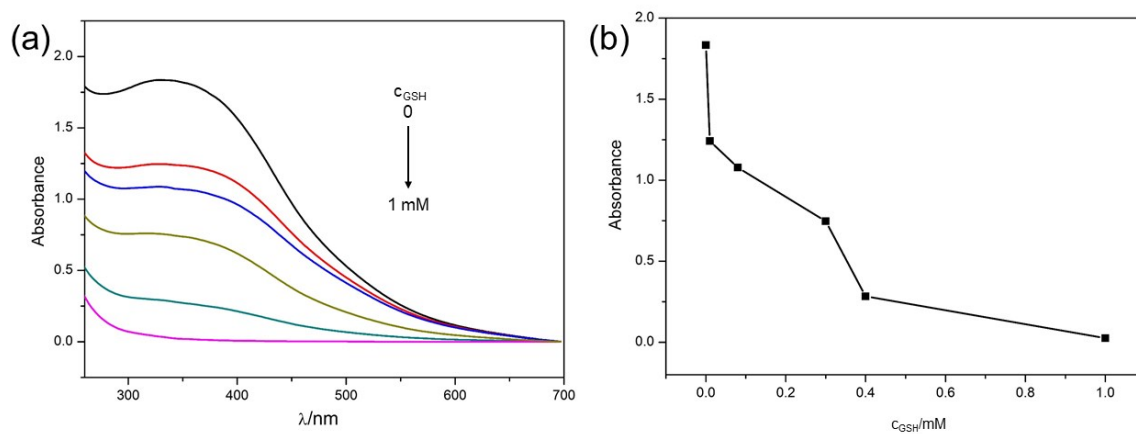

**Fig. S7** (a) UV-vis spectra of the C-dots-MnO<sub>2</sub> mixture in the presence of different concentrations of GSH (0, 0.01, 0.08, 0.3, 0.4, 1.0 mM). (b) The absorbance of C-dots-MnO<sub>2</sub> mixture at 375 nm in the presence of different concentrations of GSH.

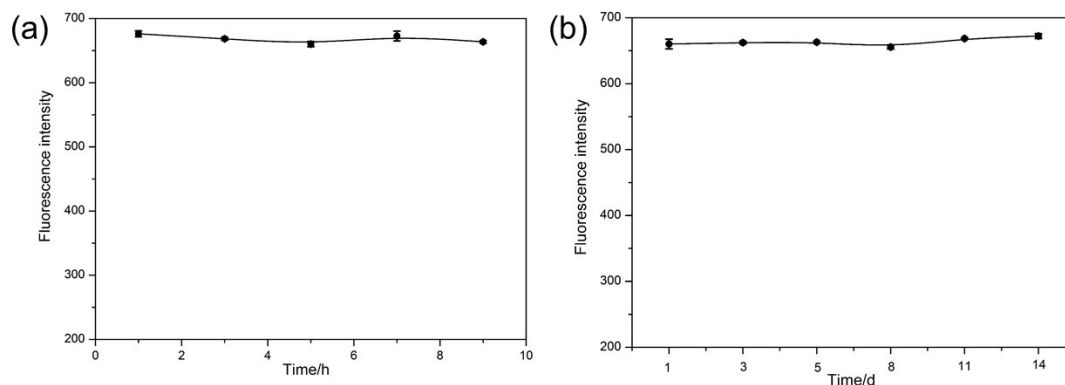

**Fig. S8** (a) The fluorescence intensity of C-dots when C-dots-MnO<sub>2</sub> nanosheets mixture were used to detect GSH (0.4 mM) every two hour on the same day. (b) The fluorescence intensity of C-dots when C-dots-MnO<sub>2</sub> nanosheets mixture were used to detect GSH (0.4 mM) in 14 days.

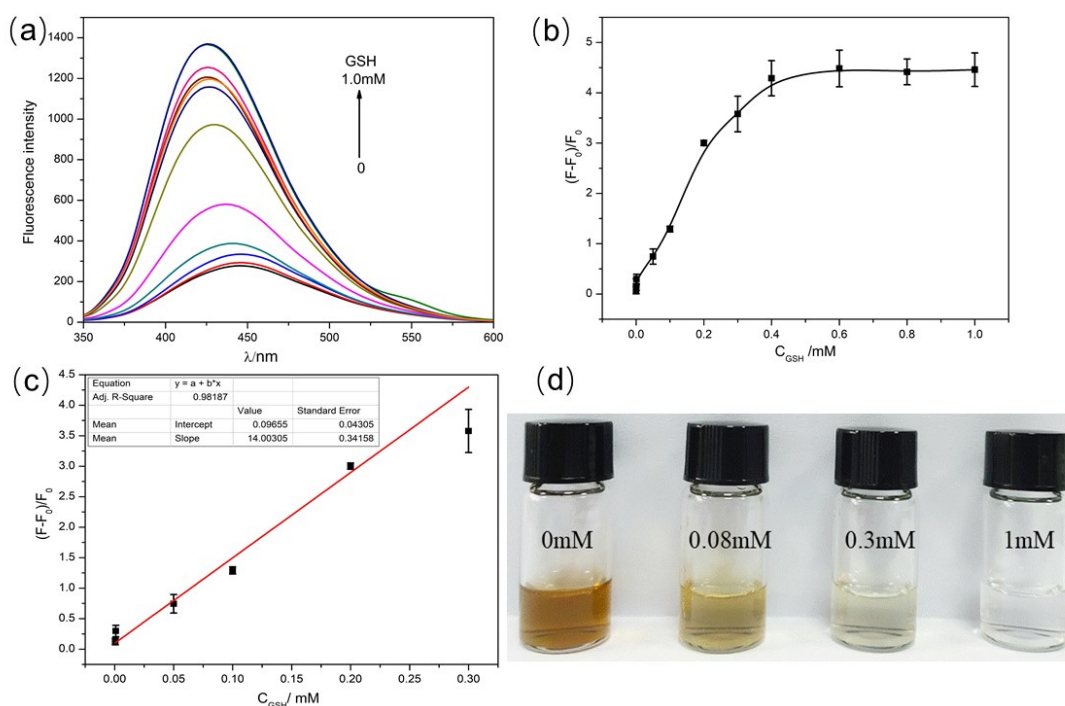

**Fig. S9** (a) Fluorescence spectra of the system with the concentrations of GSH within 0-1.0 mM in 400-fold diluted human urine. (b) The fluorescence recovery in the presence of different concentrations of GSH. (c) Calibration plot of fluorescence recovery versus GSH concentration. (d) The photos of C-dots-MnO<sub>2</sub> mixture with different concentrations of GSH (0, 0.08, 0.3, 1.0 mM) in 400-fold diluted human urine.

**Table S1** Fitting results of the fluorescence lifetimes for the C-dots, C-dots-MnO<sub>2</sub> mixture, and C-dots-MnO<sub>2</sub> mixture added with GSH.

| Sample                       | $\tau_1$ (ns) | $A_1$  | $\tau_2$ (ns) | $A_2$  | $\tau_{\text{average}}$ (ns) |
|------------------------------|---------------|--------|---------------|--------|------------------------------|
| C-dots                       | 1.3           | 1388.5 | 7.4           | 678.3  | 5.80                         |
| C-dots-MnO <sub>2</sub>      | 1.2           | 1359.3 | 7.2           | 670.5  | 5.71                         |
| C-dots-MnO <sub>2</sub> -GSH | 7.4           | 691.8  | 1.3           | 1414.6 | 5.77                         |
